# Supplementary material for: Cucurbit[7]uril-included neutral intramolecular charge-transfer ferrocene derivatives
Source: Royal Society of Chemistry journal article supplement (doi:10.1039/b709221k), 2007-01-01
Supplement: b709221k.pdf [file b709221k.pdf]

# Cucurbit[7]uril-included neutral intramolecular charge-transfer ferrocene derivatives

Ke Feng, Li-Zhu Wu,\* Li-Ping Zhang, Chen-Ho Tung

Laboratory of Organic Optoelectronic Functional Materials and Molecular Engineering, Technical Institute of Physics and Chemistry & Graduate University, the Chinese Academy of Sciences, Beijing 100080, P. R. China.

lzwu@mail.ipc.ac.cn

## Electronic Supplementary Information

**Materials.** Ferrocenecarboxaldehyde was synthesized according to the literature method.<sup>[1]</sup> Other reagents and materials were used as received.

### Scheme S1.

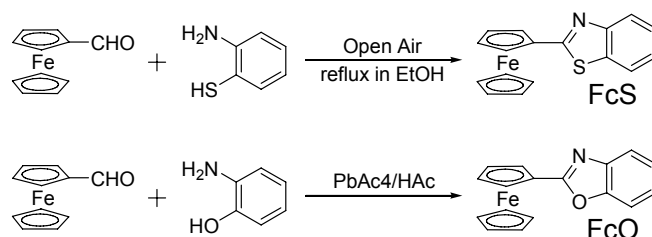

**2-Ferrocenyl benzothiazole (FcS).** The mixture of ferrocenecarboxaldehyde (214 mg, 1.00 mmol) and 2-aminothiophenol (120  $\mu$ l, 1.12 mmol) was refluxed in 15 ml ethanol for 8 h. After the system cooled down, the product was furnished as reddish-brown crystalline solid (264 mg, 0.83 mmol, 83% yield), the filtrate could be concentrated and further neutral aluminum oxide chromatograph with petroleum ether and dichloromethane gave another 22 mg product, the total yield was 90%. MS:  $m/z = 319$  ( $M^+$ ). <sup>1</sup>H NMR ( $CDCl_3$ , 400 MHz)  $\delta$ : 7.97 (d,  $J = 8$  Hz, 1H), 7.82 (dd,  $J = 8$  and 1 Hz, 1H), 7.45 (t,  $J = 8$  Hz, 1H), 7.34 (t,  $J = 8$  Hz, 1H), 5.01 (s, 2H), 4.50 (s, 2H), 4.15 (s, 5H). <sup>13</sup>C NMR ( $CDCl_3$ , 400 MHz)  $\delta$ : 169.7, 153.9, 134.7, 126.1, 124.4, 122.2, 121.3, 70.8, 70.4, 68.8. Anal. Calcd. for  $C_{17}H_{13}FeNS$ : C, 63.97; H, 4.10; N, 4.39. Found: C, 64.26; H, 4.21; N, 4.56.

**2-Ferrocenyl benzoxazole (FcO).** The mixture of ferrocenecarboxaldehyde (214 mg, 1.00 mmol) and 2-aminophenol (110 mg, 1.00 mmol) was stirred at r.t. in 5 ml acetic acid for 15 min, another 20 ml hot acetic acid solution of PbAc<sub>4</sub> (450 mg 1.01 mmol) was dropped into the system in 30 min, then the mixture was pored onto 30 g ice and extracted with dichloromethane, further neutral aluminum oxide chromatograph with petroleum ether and dichloromethane furnished the product as reddish-brown crystalline solid (101 mg, 0.34 mmol, 34% yield). MS:  $m/z = 303$  ( $M^+$ ). <sup>1</sup>H NMR ( $CDCl_3$ , 400 MHz)  $\delta$ : 7.69 (m, 1H), 7.52 (m, 1H), 7.32 (m, 2H), 5.09 (s, 2H), 4.52 (s, 2H), 4.19 (s, 5H). <sup>13</sup>C NMR ( $CDCl_3$ , 400 MHz)  $\delta$ : 166.5, 150.7, 142.5, 124.4, 124.3, 119.3, 110.3, 71.2,

70.0, 69.8, 68.7. Anal. Calcd. for  $C_{17}H_{13}FeNO$ : C, 67.36; H, 4.32; N, 4.62. Found: C, 67.47; H, 4.24; N, 4.78. Crystallographic data for **FcO** has been deposited with the Cambridge Crystallographic Data Centre as supplementary publication No. CCDC 643870.

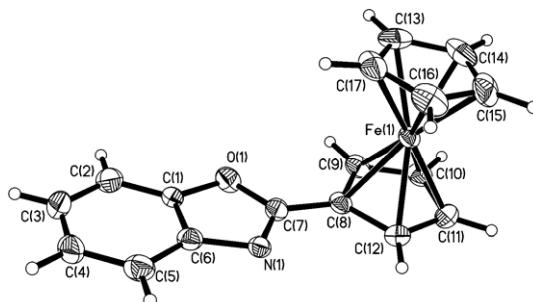

**Figure. S1** X-ray crystal structure of **FcO**.

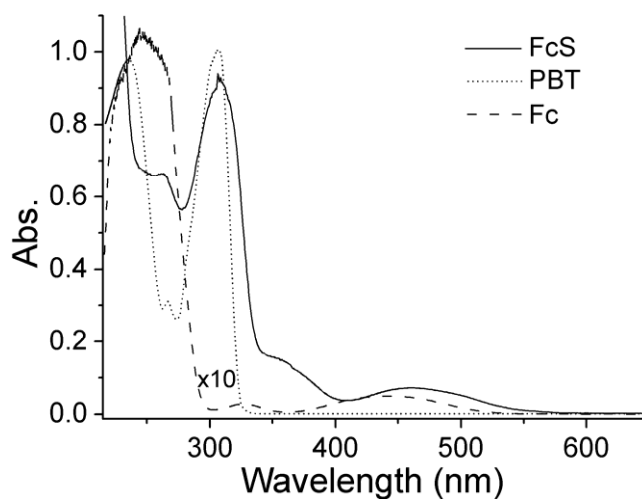

**Figure S2.** Absorption spectra of **FcS**, 2-phenyl benzothiazole (**PBT**) and **Fc** ( $\sim 6 \times 10^{-5}$  M) in methanol

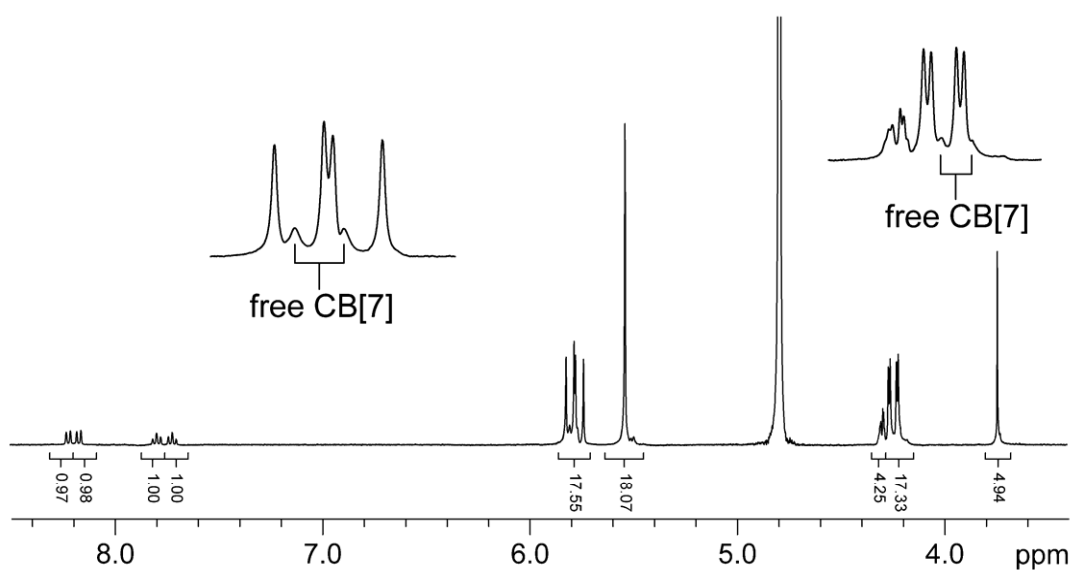

**Figure S3.**  $^1H$  NMR integral on **FcS@CB[7]** in  $D_2O$  at 298 K.

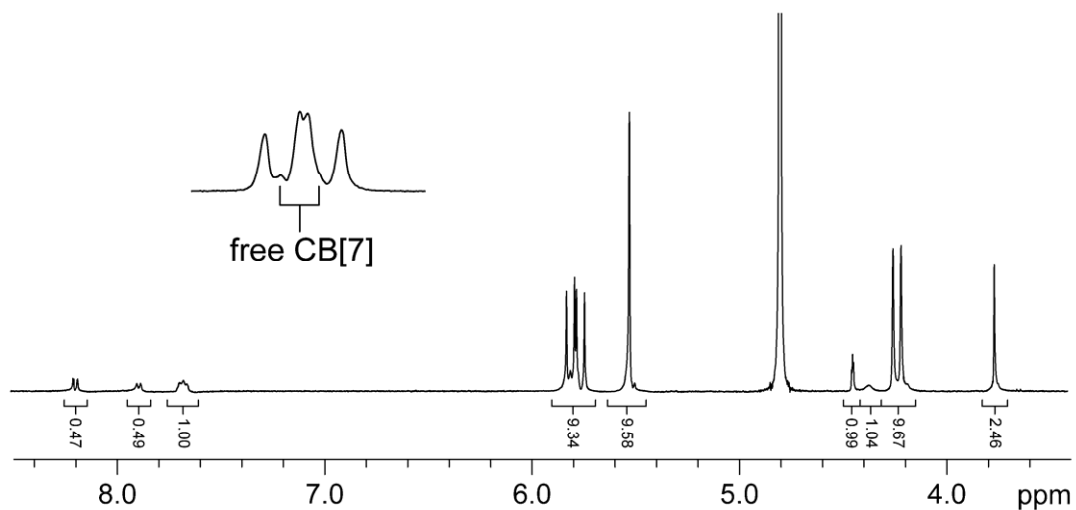

Figure S4. <sup>1</sup>H NMR integral on FcO@CB[7] in D<sub>2</sub>O at 298 K.

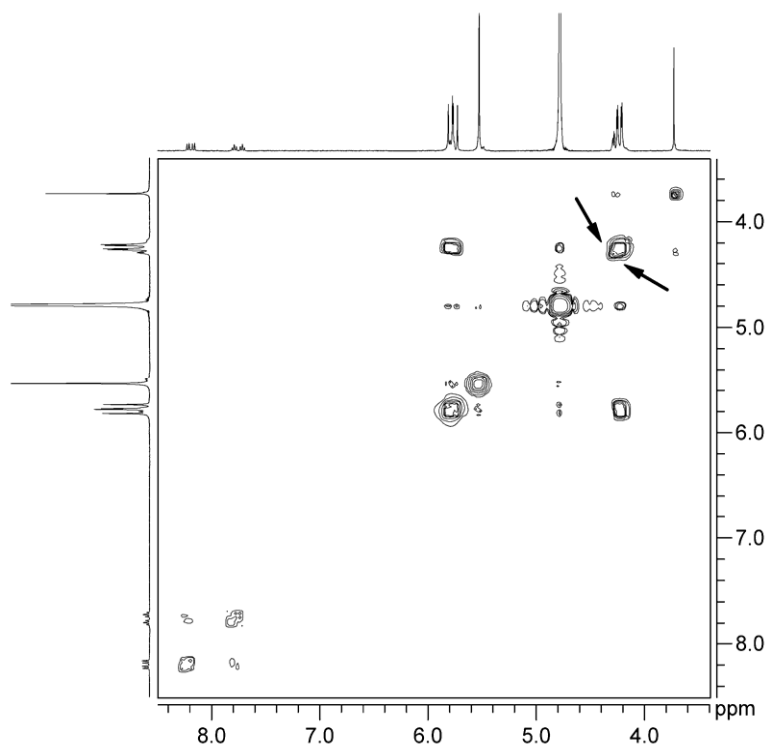

Figure S5. 2D COSY NMR spectrum of FcS@CB[7] in D<sub>2</sub>O at 298 K.

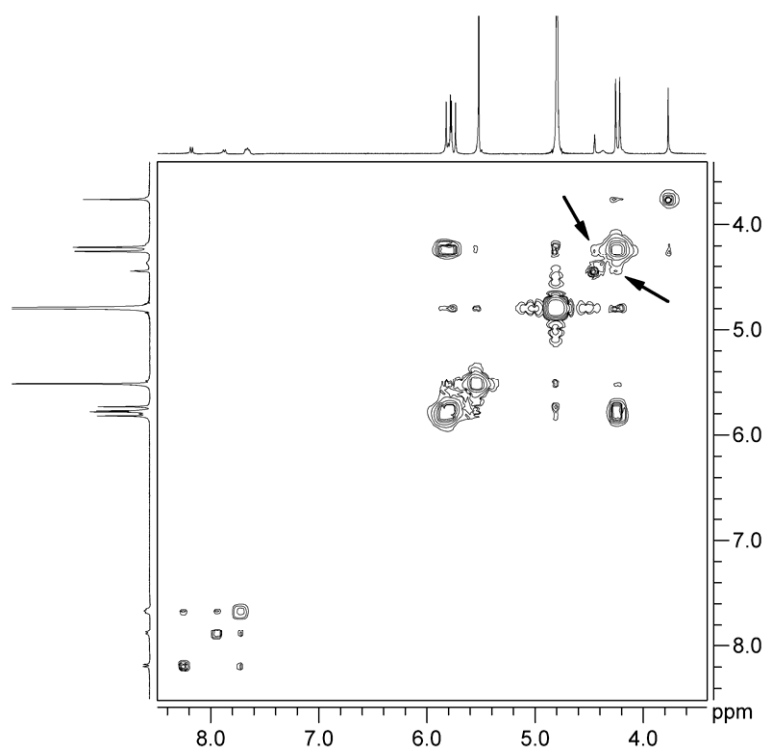

**Figure S6.** 2D COSY NMR spectrum of **FcO@CB[7]** in D<sub>2</sub>O at 298 K.

#### References

- (1) Graham, P. J.; Lindsey, R. V.; Parshall, G. W.; Peterson, M. L.; Whitman, G. M. *J. Am. Chem. Soc.* **1957**, *79*, 3416-3420.
